# Supplementary material for: Synaptic up-scaling preserves motor circuit output after chronic, natural inactivity
Source: eLife journal article supplement (doi:10.7554/elife.30005), 2017-09-15
Supplement: supp [file elife-30005-supp-v1.zip]

Archive with 3 entries (3 files):
- elife_poa_e30005_Figure_5_figure_supplement_1.pdf
- elife_poa_e30005_Supplementary_file_1_statistics_information.xlsx
- elife_poa_e30005_Transparent_Reporting_File.pdf
