# Supplementary material for: Synaptic up-scaling preserves motor circuit output after chronic, natural inactivity
Source: eLife journal article supplement (doi:10.7554/elife.30005), 2017-09-15
Supplement: supp [file elife-30005-supp-v1.zip › elife_poa_e30005_Supplementary_file_1_statistics_information.xlsx]

## Sheet: Sheet1
Supplementary Table 1 Statistics Information for Figures
Figure 2	Statistical Test	p-value	Degrees of Freedom	T statistic	control, sample size	winter inactivity sample size
2A	N/A	N/A	N/A	N/A	N/A	N/A
2B	Two-tailed unpaired t test	0.0073	30	2.878	16	16
2C	Two-tailed Mann Whitney Test	0.0017	N/A	N/A	16	16
2D	Two-tailed unpaired t test with Welch's Correction	0.8213	23.62	0.226	16	16
2E	Two-tailed Mann Whitney Test	0.999	N/A	N/A	16	16
2F	Two-tailed unpaired t test	0.559	30	0.591	16	16
Figure 3	Statistical Test	p-value	Degrees of Freedom (n,d)	F statsitic
3A	Linear Regression	<0.0001	1798	77522
3B (control vs. winter inactivity)	Kolomogorov-Smirnov Test	2.2x10-16	N/A	N/A
3B (control vs. scaled winter inactivity)	Kolomogorov-Smirnov Test	0.1403	N/A	N/A
Figure 4	Statistical Test	p-value	Degrees of Freedom	F/T statistic	control, sample size	winter inactivity sample size
4A	N/A	N/A	N/A	N/A	N/A	N/A
4B	Analysis of Covariance	0.9147	1575	0.0147 (F)	16	16
4C	Two-tailed unpaired t test	0.7538	30	0.3165 (T)	16	16
Figure 5	Statistical Test	p-value	Degrees of Freedom	T statistic	control, sample size	winter inactivity sample size
5C1	Two-tailed Mann Whitney Test	0.0286	6	N/A	4	4
5D1	Two-tailed Mann Whitney Test	0.0286	6	N/A	4	4
5E1	Two-tailed Mann Whitney Test	0.6571	6	N/A	4	4
5E2	Paired t test (DNQX on control preps)	0.0486	3	2.385	4	4
5E2	Paired t test (DNQX on winter inactivity preps)	0.0199	3	3.488	4	4
5E2 (baseline control vs. winter)	Two-tailed Mann Whitney Test	0.0286	6	N/A	4	4
Figure 5 Figure Supplement 1	Statistical Test	p-value	Degrees of Freedom	T statistic
Figure 5 Figure Supplement 1A	Paired t test	0.0351	3	3.66
Figure 5 Figure Supplement 1A DNQX	One- sample t test (Change from 100%)	0.0333	3	3.741
Figure 5 Figure Supplement 1A Washout	One- sample t test (Change from 100%)	0.0609	3	2.932
Figure 5 Figure Supplement 1B	Paired t test	0.3113	3	1.215
Figure 5 Figure Supplement 1B DNQX	One- sample t test (Change from 100%)	0.7998	3	0.2769
Figure 5 Figure Supplement 1B Washout	One- sample t test (Change from 100%)	0.3808	3	1.025
