# Supplementary figures and images for: Synaptic up-scaling preserves motor circuit output after chronic, natural inactivity
Source: eLife journal article supplement (doi:10.7554/elife.30005), 2017-09-15

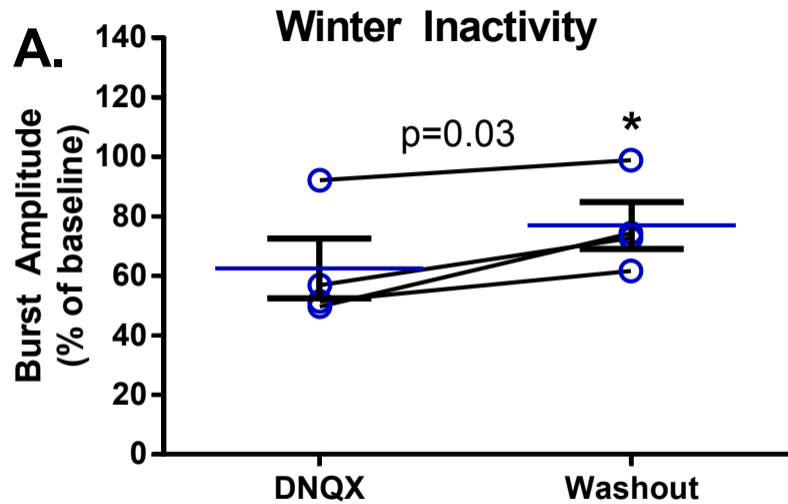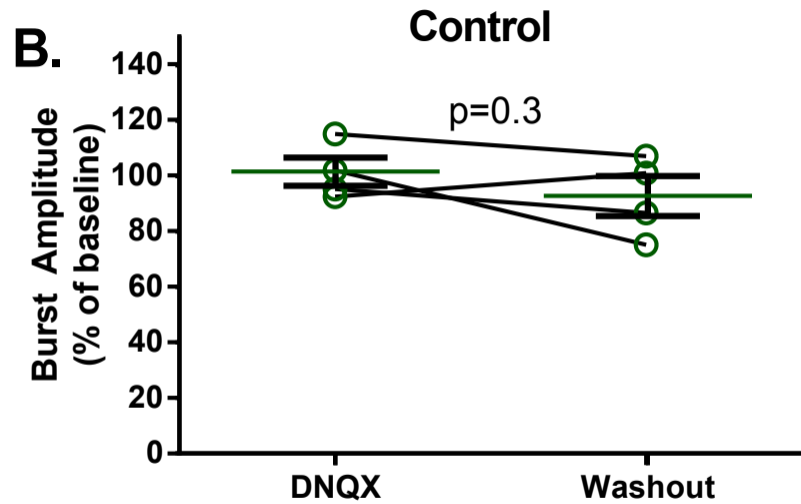

Supplement: supp [file elife-30005-supp-v1.zip › elife_poa_e30005_Figure_5_figure_supplement_1.pdf]
